# Supplementary material
Source: PubMed Central journal article supplement (PMC7498470)
Supplement: mmc1.pdf [file mmc1.pdf]

# THE LANCET

## Gastroenterology & Hepatology

### Supplementary appendix

This appendix formed part of the original submission and has been peer reviewed.  
We post it as supplied by the authors.

Supplement to: Lemoine M, Kim JU, Ndow G, et al. Effect of the COVID-19 pandemic on viral hepatitis services in sub-Saharan Africa. *Lancet Gastroenterol Hepatol* 2020; published online Sept 17. [https://doi.org/10.1016/S2468-1253\(20\)30305-8](https://doi.org/10.1016/S2468-1253(20)30305-8).

## Appendix

### Impact of COVID-19 pandemic on the viral hepatitis services in sub-Saharan Africa

Maud Lemoine, Jin Un Kim, Gibril Ndow, Sulayman Bah, Karen Forrest, John Rwegasha, Marielle Bouyou,

Delphine Napon, Sosthene Somda, Appolinaire Sawadogo, Roger Sombie, and Yusuke Shimakawa

#### Appendix 1. Study questionnaire

1. What is the number of patients seen weekly in your department in the past 4 months?

*1. Quel est le nombre des patients vus chaque semaine dans votre service dans les derniers 4 mois?*

|                                | 1. New patients with HBV | 2. Follow-up patients with HBV | 3. New patients with HCV | 4. Follow-up patients with HCV |
|--------------------------------|--------------------------|--------------------------------|--------------------------|--------------------------------|
| 1st week of Jan (06/01/2020)   |                          |                                |                          |                                |
| 2nd week of Jan (13/01/2020)   |                          |                                |                          |                                |
| 3rd week of Jan (20/01/2020)   |                          |                                |                          |                                |
| 4th week of Jan (27/01/2020)   |                          |                                |                          |                                |
| 1st week of Feb (03/02/2020)   |                          |                                |                          |                                |
| 2nd week of Feb (10/02/2020)   |                          |                                |                          |                                |
| 3rd week of Feb (17/02/2020)   |                          |                                |                          |                                |
| 4th week of Feb (24/02/2020)   |                          |                                |                          |                                |
| 1st week of March (02/03/2020) |                          |                                |                          |                                |
| 2nd week of March (09/03/2020) |                          |                                |                          |                                |
| 3rd week of March (16/03/2020) |                          |                                |                          |                                |
| 4th week of March (23/03/2020) |                          |                                |                          |                                |
| 5th week of March (30/03/2020) |                          |                                |                          |                                |
| 1st week of April (06/04/2020) |                          |                                |                          |                                |
| 2nd week of April (13/04/2020) |                          |                                |                          |                                |
| 3rd week of April (20/04/2020) |                          |                                |                          |                                |
| 4th week of April (27/04/2020) |                          |                                |                          |                                |

2. Why do you think the patients stop coming?

*2. Pourquoi pensez-vous que les patients ne viennent plus?*

3. Do you have any cases of hepatitis who deteriorated liver functions because of disrupted care/treatment? If yes, please make a brief description.

3. Avez-vous des cas des hépatites qui ont détérioré la maladie du foie à cause des soins et des traitements perturbés? Si oui, pouvez-vous donner une brève description?

4. Are the following hepatitis care services available without any disruption?

4. Est-ce que les services suivantes pour les patients des hépatites sont disponibles sans aucune interruption?

Consultation with specialist

Biochemistry test

Haematology test

HBsAg

HBeAg

HBV viral load (HBV DNA)

HCV serology test (anti-HCV)

HCV viral load (HCV RNA)

Liver Ultrasound

Anti-HBV treatment (Tenofovir)

Ant-HCV treatment

Paracentesis

5. General questions for Covid-19 preparedness.

5. Question générale sur la préparation à Covid-19.

5.1. How many ICU beds available in your country?

5.1. Combien de lits de soins intensifs disponibles dans votre pays?

5.2. How many ventilators (that can work) available in your country?

5.2. Combien de respirateurs en fonction sont disponibles dans votre pays?

5.3 How many PCR machines are used for covid-19 diagnosis in your country?

5.3. Combien de machines PCR sont utilisées pour diagnostiquer covid-19 dans votre pays?

6. Have any of your staff in liver clinic been relocated to COVID-19 services? If yes, how many of them? All of them? Half of them? Or only a few of them?

*6. Votre staff a-t-il été délocalisé pour travailler sur COVID-19? Si oui, combien d'entre eux? Tous? La moitié? Ou juste quelques?*

7. When was the lockdown set up in your country?

*7. Quand le confinement ou le couvre-feu a-t-il été mis en place dans votre pays?*

8. Do you think the lockdown has been well respected by the population?

*8. Pensez-vous que le confinement ou le couvre-feu est bien suivi dans votre pays?*

9. Do you feel overall the care of the non-covid patients have been generally affected?

Yes, significantly?

Yes, a little bit?

No?

*9. Pensez-vous que la prise en charge des patients non-COVID a été significativement impactée par l'épidémie de COVID?*

*Oui, beaucoup?*

*Oui, un peu?*

*Non?"*

|                                                | Jan 2020 | Feb 2020 | Mar 2020 | Apr 2020 |
|------------------------------------------------|----------|----------|----------|----------|
| <b>Follow-up patients with viral hepatitis</b> |          |          |          |          |
| <b>Burkina Faso</b>                            | 185      | 162      | 95       | 50       |
| <b>The Gambia</b>                              | 142      | 89       | 79       | 15       |
| <b>Tanzania</b>                                | 35       | 37       | 26       | 8        |
| <b>New patients with viral hepatitis</b>       |          |          |          |          |
| <b>Burkina Faso</b>                            | 96       | 82       | 29       | 28       |
| <b>The Gambia</b>                              | 36       | 20       | 24       | 6        |
| <b>Tanzania</b>                                | 107      | 85       | 81       | 5        |

**Table:** number of follow-up and new patients with viral hepatitis seen in the liver clinic in the three study countries.
